# Supplementary material for: SF3B1 mutation is a prognostic factor in chronic lymphocytic leukemia: a meta-analysis
Source: PubMed Central journal article supplement (PMC5642526; doi:10.18632/oncotarget.19455), 2017-07-22
Supplement: oncotarget-08-69916-s001.pdf [file oncotarget-08-69916-s001.pdf]

# SF3B1 mutation is a prognostic factor in chronic lymphocytic leukemia: a meta-analysis

## SUPPLEMENTARY MATERIALS

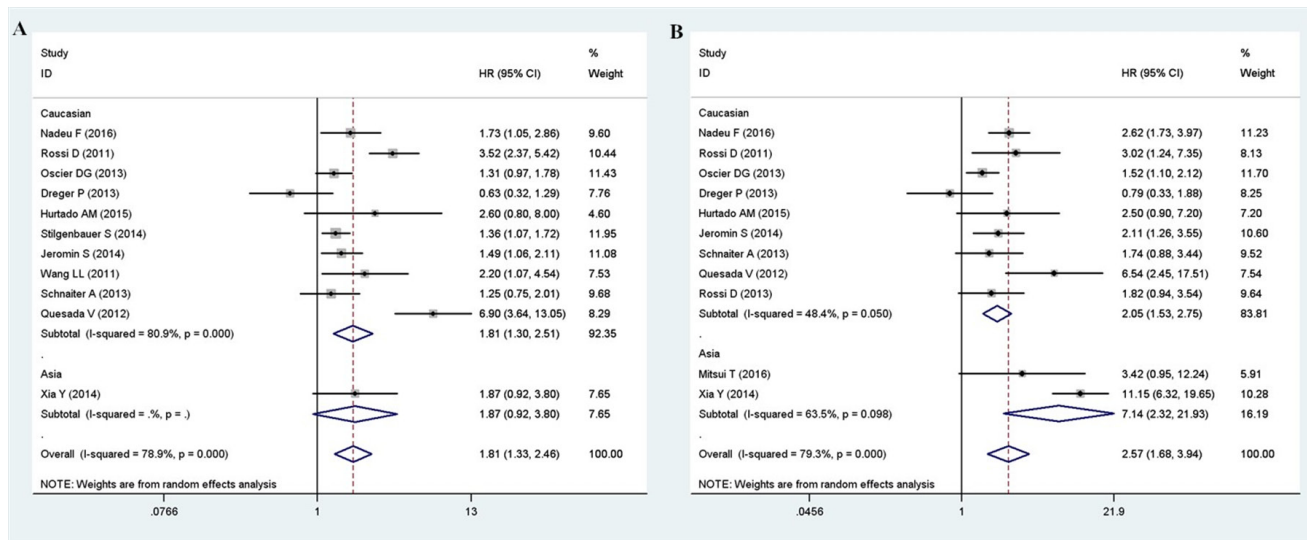

Supplementary Figure 1: Patients source subgroup analysis of the association between SF3B1 mutation and PFS (A) / OS (B) of CLL.

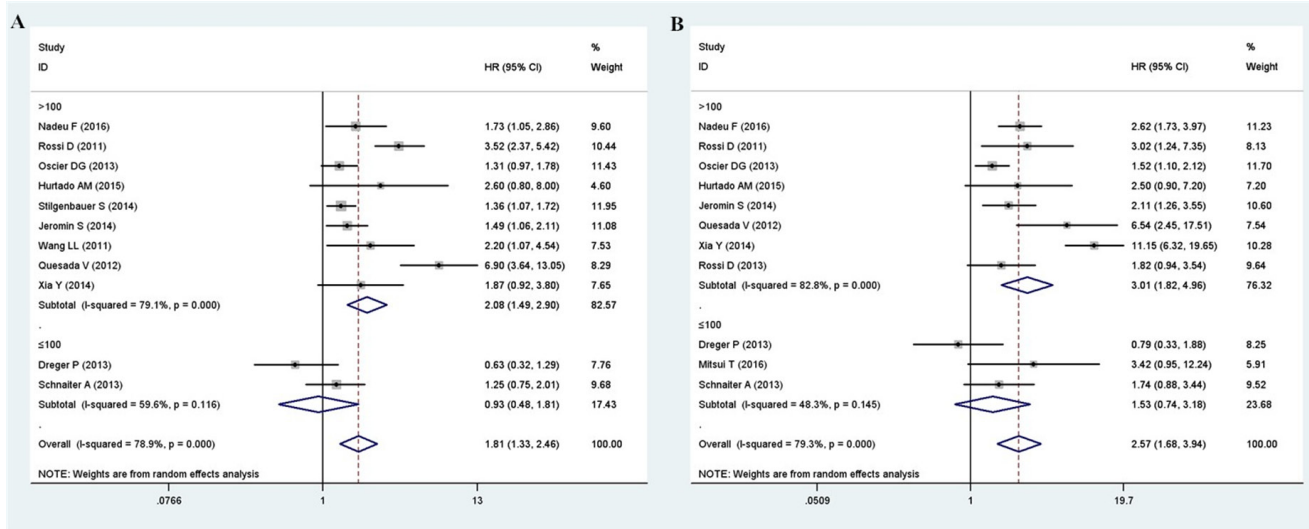

Supplementary Figure 2: Sample size subgroup analysis of the association between SF3B1 mutation and PFS (A) / OS (B) of CLL.

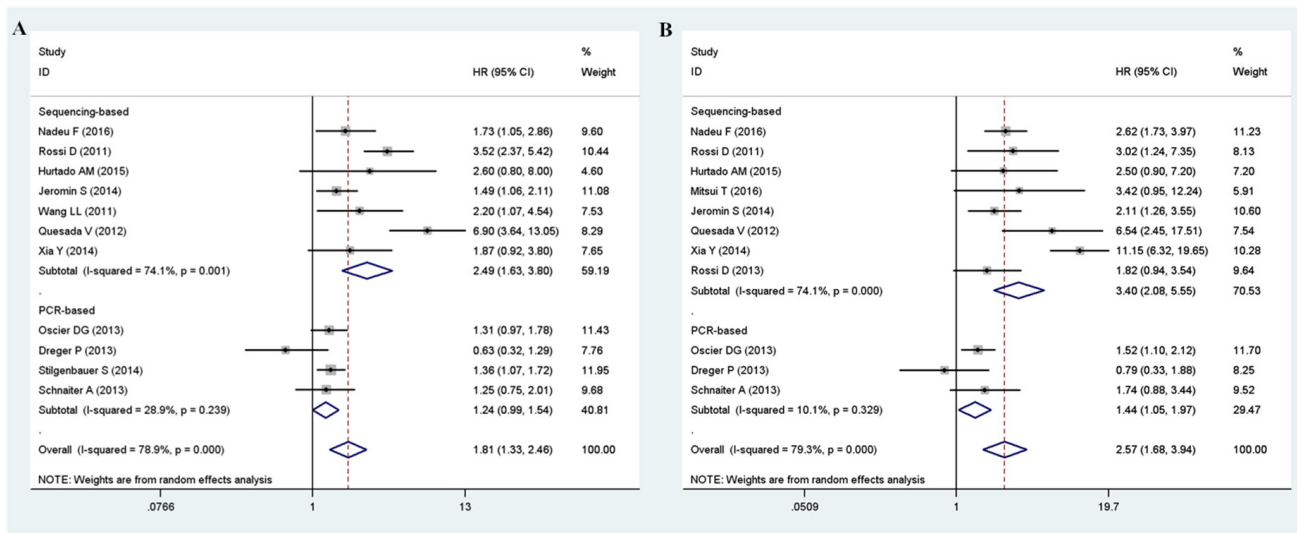

**Supplementary Figure 3:** Detection methods subgroup analysis of the association between SF3B1 mutation and PFS (A) / OS (B) of CLL.

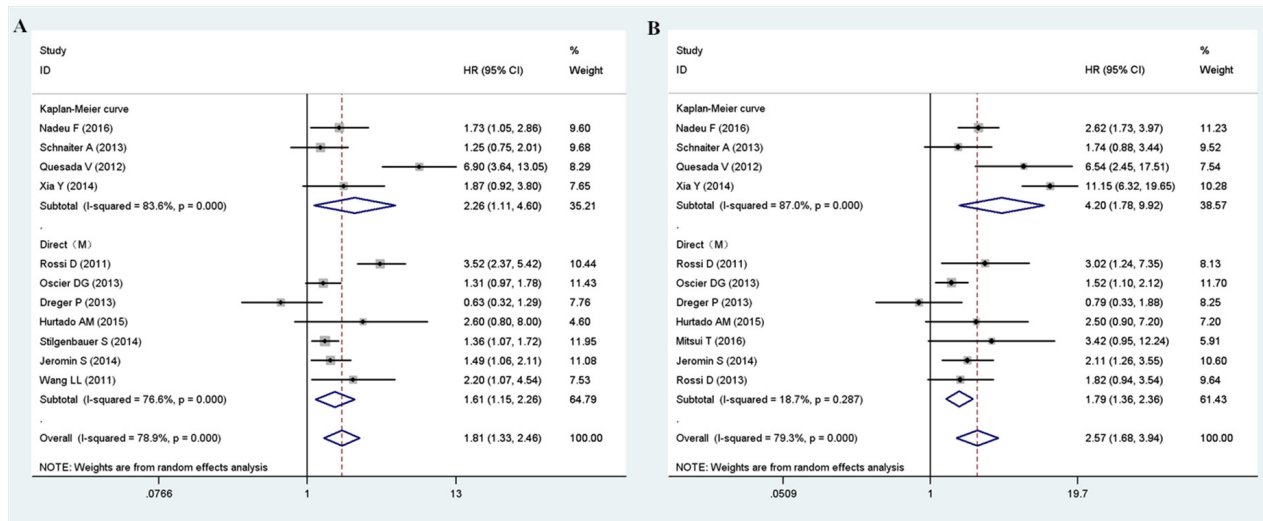

Supplementary Figure 4: Data extraction subgroup analysis of the association between SF3B1 mutation and PFS (A) / OS (B) of CLL.
